# Supplementary material
Source: PubMed Central journal article supplement (PMC5486874)
Supplement: NIHMS866883-supplement-Supplemental_PDF.pdf [file NIHMS866883-supplement-Supplemental_PDF.pdf]

**SUPPLEMENTAL MATERIAL**

**for**

**de Lemos et al. A Multimodality Strategy for Cardiovascular Risk Assessment: Performance in Two  
Population-Based Cohorts**

**Supplementary Table 1. Spearman correlation coefficients between individual test results in MESA**

| VARIABLE     | ECG Voltage* | CAC   | NT-proBNP | hs-cTnT | Hs-CRP |
|--------------|--------------|-------|-----------|---------|--------|
| ECG Voltage* |              | -0.03 | 0.02      | 0.03    | -0.05  |
| CAC          | -0.03        |       | 0.20      | 0.37    | -0.01  |
| NT-proBNP    | 0.02         | 0.20  |           | 0.20    | 0.08   |
| hs-cTnT      | 0.03         | 0.37  | 0.20      |         | 0.02   |
| Hs-CRP       | -0.05        | -0.01 | 0.08      | 0.02    |        |

\*ECG voltage by Sokolow-Lyon method. Spearman rho correlation coefficients are reported

**Supplementary Table 2. Spearman correlation coefficients between individual test results in DHS**

| VARIABLE     | ECG Voltage* | CAC   | NT-proBNP | hs-cTnT | Hs-CRP |
|--------------|--------------|-------|-----------|---------|--------|
| ECG Voltage* |              | -0.03 | -0.05     | 0.04    | -0.09  |
| CAC          | -0.03        |       | 0.01      | 0.24    | 0.18   |
| NT-proBNP    | -0.05        | 0.01  |           | 0.02    | 0.12   |
| hs-cTnT      | 0.04         | 0.24  | 0.02      |         | -0.01  |
| Hs-CRP       | -0.09        | 0.18  | 0.12      | -0.01   |        |

\*ECG voltage by Sokolow-Lyon method. Spearman rho correlation coefficients are reported

**Supplementary Table 3. Association of test results with the composite coronary heart disease (CHD)**

**endpoint.**

| Variable                        | Unadjusted<br>HR (95% CI) |                    | Model 1<br>HR (95% CI) | Model 2<br>HR (95% CI) |
|---------------------------------|---------------------------|--------------------|------------------------|------------------------|
|                                 | MESA                      | DHS                | MESA                   | MESA                   |
| <b>Continuous Test Results</b>  |                           |                    |                        |                        |
| ECG-LVH *                       | 1.48 (1.06, 2.06)         | 2.42 (1.26, 4.65)  | 1.09 (0.77, 1.53)      | 0.96 (0.68, 1.36)      |
| Ln (CAC+1)                      | 2.26 (2.03, 2.53)         | 1.33 (1.02, 1.74)  | 1.73 (1.52, 1.98)      | 1.63 (1.43, 1.86)      |
| Ln (NT-proBNP)                  | 1.78 (1.59, 2.00)         | 1.53 (1.18, 1.98)  | 1.58 (1.39, 1.80)      | 1.31 (1.17, 1.46)      |
| Ln (hs-cTnT)                    | 1.85 (1.71, 2.00)         | 1.83 (1.57, 2.13)  | 1.50 (1.35, 1.66)      | 1.32 (1.18, 1.47)      |
| Ln (hs-CRP)                     | 1.10 (0.98, 1.22)         | 1.33 (1.02, 1.74)  | 1.05 (0.93, 1.18)      | 1.01 (0.89, 1.14)      |
|                                 |                           |                    |                        |                        |
| <b>Categorical test results</b> |                           |                    |                        |                        |
| ECG-LVH *                       | 1.48 (1.06, 2.06)         | 2.42 (1.26, 4.65)  | 1.09 (0.77, 1.53)      | 1.02 (0.72, 1.44)      |
| CAC > 10 U                      | 4.92 (3.80, 6.38)         | 6.95 (4.16, 11.63) | 2.76 (2.07, 3.68)      | 2.63 (1.97, 3.51)      |
| NT-proBNP ≥100 pg/mL            | 2.50 (2.00, 3.11)         | 3.44 (1.97, 6.03)  | 1.92 (1.49, 2.47)      | 1.77 (1.37, 2.28)      |
| hs-cTnT ≥ 5 ng/L                | 3.21 (2.52, 4.08)         | 4.58 (2.75, 7.62)  | 1.57 (1.20, 2.06)      | 1.42 (1.08, 1.86)      |
| hs-CRP ≥ 3 mg/L                 | 1.21 (0.97, 1.52)         | 1.81 (1.09, 3.02)  | 1.16 (0.91, 1.47)      | 1.10 (0.87, 1.39)      |

Only unadjusted results are presented in DHS, due to small numbers of endpoint events. Model 1 is adjusted for age, sex, race, smoking status, diabetes, total cholesterol, HDL-cholesterol, systolic blood pressure and blood pressure medications, and statin medications. Model 2 includes the components of model 1 and all 5 test results. The Hazard Ratio (HR) for continuous test results reflects a one standard deviation change in Ln value of the test result. Coefficients were determined separately for each model.

\* ECG-LVH was treated as a categorical variable in both analyses.

**Supplementary Table 4. Association of test results with incident heart failure**

| Variable                        | Unadjusted<br>HR (95% CI) |                     | Model 1<br>HR (95% CI) | Model 2<br>HR (95% CI) |
|---------------------------------|---------------------------|---------------------|------------------------|------------------------|
|                                 | MESA                      | DHS                 | MESA                   | MESA                   |
| <b>Continuous Test Results</b>  |                           |                     |                        |                        |
| <b>ECG-LVH*</b>                 | 2.63 (1.93, 3.57)         | 7.27 (3.40, 15.52)  | 1.93 (1.40, 2.65)      | 1.50 (1.08, 2.07)      |
| <b>Ln (CAC+1)</b>               | 2.06 (1.82, 2.32)         | 1.49 (1.12, 1.99)   | 1.42 (1.23, 1.63)      | 1.26 (1.09, 1.45)      |
| <b>Ln (NT-proBNP)</b>           | 2.73 (2.42, 3.09)         | 2.72 (2.11, 3.52)   | 2.50 (2.16, 2.90)      | 2.05 (1.76, 2.39)      |
| <b>Ln (hs-cTnT)</b>             | 2.08 (1.92, 2.25)         | 1.96 (1.59, 2.42)   | 1.71 (1.53, 1.92)      | 1.43 (1.27, 1.61)      |
| <b>Ln (hs-CRP)</b>              | 1.33 (1.18, 1.50)         | 1.57 (1.04, 2.36)   | 1.29 (1.23, 1.42)      | 1.21 (1.05, 1.39)      |
|                                 |                           |                     |                        |                        |
| <b>Categorical test results</b> |                           |                     |                        |                        |
| <b>ECG-LVH*</b>                 | 2.63 (1.93, 3.57)         | 7.27 (3.40, 15.52)  | 1.93 (1.40, 2.65)      | 1.64 (1.19, 2.27)      |
| <b>CAC &gt; 10 U</b>            | 3.54 (2.70, 4.64)         | 2.07 (0.93, 4.56)   | 1.66 (1.23, 2.24)      | 1.49 (1.10, 2.02)      |
| <b>NT-proBNP ≥100 pg/mL</b>     | 4.77 (3.70, 6.14)         | 12.06 (5.71, 25.51) | 3.58 (2.69, 4.78)      | 3.15 (2.35, 4.22)      |
| <b>hs-cTnT ≥ 5 ng/L</b>         | 5.45 (4.02, 7.40)         | 7.47 (3.55, 15, 69) | 2.47 (1.76, 3.46)      | 2.19 (1.56, 3.08)      |
| <b>hs-CRP ≥ 3 mg/L</b>          | 1.80 (1.41, 2.30)         | 2.64 (1.19, 5.82)   | 1.61 (1.23, 2.10)      | 1.51(1.15, 1.97)       |

Only unadjusted results are presented in DHS, due to small numbers of endpoint events. Model 1 is adjusted for age, sex, race, smoking status, diabetes, total cholesterol, HDL-cholesterol, systolic blood pressure and blood pressure medications, statin medications, BMI and creatinine. Model 2 includes the components of model 1 and all 5 test results. The Hazard Ratio (HR) for continuous test results reflects a one standard deviation change in Ln value of the test result. Coefficients were determined separately for each model.

\* ECG-LVH was treated as a categorical variable in both analyses.

**Supplementary Table 5. Association of test results with all-cause mortality**

| Variable                        | Unadjusted<br>HR (95% CI) |                   | Model 1<br>HR (95% CI) | Model 2<br>HR (95% CI) |
|---------------------------------|---------------------------|-------------------|------------------------|------------------------|
|                                 | MESA                      | DHS               | MESA                   | MESA                   |
| <b>Continuous Test Results</b>  |                           |                   |                        |                        |
| <b>ECG-LVH*</b>                 | 1.45 (1.18, 1.79)         | 1.73 (0.96, 3.11) | 1.03 (0.84, 1.29)      | 0.93 (1.07, 1.25)      |
| <b>Ln (CAC+1)</b>               | 1.83 (1.72, 1.96)         | 1.74 (1.50, 2.01) | 1.23 (1.14, 1.33)      | 1.16 (1.07, 1.25)      |
| <b>Ln (NT-proBNP)</b>           | 1.95 (1.81, 2.09)         | 1.84 (1.51, 2.23) | 1.51 (1.39, 1.64)      | 1.37 (1.26, 1.49)      |
| <b>Ln (hs-cTnT)</b>             | 1.81 (1.73, 1.90)         | 1.89 (1.67, 2.13) | 1.38 (1.29, 1.47)      | 1.25 (1.16, 1.35)      |
| <b>Ln (hs-CRP)</b>              | 1.15 (1.07, 1.23)         | 1.40 (1.13, 1.75) | 1.12 (1.03, 1.20)      | 1.08 (1.01, 1.17)      |
|                                 |                           |                   |                        |                        |
| <b>Categorical test results</b> |                           |                   |                        |                        |
| <b>ECG-LVH*</b>                 | 1.45 (1.18, 1.79)         | 1.73 (0.96, 3.11) | 1.03 (0.84, 1.28)      | 0.97 (0.79, 1.21)      |
| <b>CAC &gt; 10 U</b>            | 3.00 (2.60, 3.48)         | 3.22 (2.14, 4.85) | 1.36 (1.16, 1.50)      | 1.28 (1.09, 1.50)      |
| <b>NT-proBNP ≥100 pg/mL</b>     | 2.92 (2.54, 3.34)         | 3.89 (2.51, 6.02) | 1.78 (1.53, 2.08)      | 1.70 (1.45, 1.98)      |
| <b>hs-cTnT ≥ 5 ng/L</b>         | 3.33 (2.87, 3.88)         | 4.82 (3.20, 7.25) | 1.44 (1.22, 1.71)      | 1.35 (1.13, 1.60)      |
| <b>hs-CRP ≥ 3 mg/L</b>          | 1.27 (1.10, 1.46)         | 1.77 (1.18, 2.67) | 1.25 (1.08, 1.45)      | 0.97 (0.79, 1.21)      |

Only unadjusted results are presented in DHS, due to small numbers of endpoint events. Model 1 is adjusted for age, sex, race, smoking status, diabetes, total cholesterol, HDL-cholesterol, systolic blood pressure blood pressure medications, and statin medications. Model 2 includes the components of model 1 and all 5 test results. The Hazard Ratio (HR) for continuous test results reflects a one standard deviation change in Ln value of the test result. Coefficients were determined separately for each model.

\* ECG-LVH was treated as a categorical variable in both analyses.

**Supplementary Table 6. Association of test results with cardiovascular mortality**

| Variable                                    | Unadjusted<br>HR (95% CI) |                   | Model 1<br>HR (95% CI) | Model 2<br>HR (95% CI) |
|---------------------------------------------|---------------------------|-------------------|------------------------|------------------------|
|                                             | MESA                      | DHS               | MESA                   | MESA                   |
| <b>Continuous Test Results</b>              |                           |                   |                        |                        |
| <b>ECG-LVH*</b>                             | 1.53 (1.06, 2.22)         | 1.92 (0.86, 4.29) | 1.55 (1.06, 2.27)      | 1.30 (0.89, 1.92)      |
| <b>Ln (CAC+1)</b>                           | 1.58 (1.36, 1.84)         | 1.86 (1.51, 2.29) | 1.37 (1.16, 1.61)      | 1.25 (1.07, 1.48)      |
| <b>Ln (NT-proBNP)</b>                       | 1.66 (1.32, 1.92)         | 1.70 (1.28, 2.25) | 1.87 (1.59, 2.20)      | 1.60 (1.35, 1.90)      |
| <b>Ln (hs-cTnT)</b>                         | 1.52 (1.35, 1.70)         | 1.82 (1.52, 2.17) | 1.51 (1.32, 1.73)      | 1.28 (1.11, 1.48)      |
| <b>Ln (hs-CRP)</b>                          | 1.16 (1.00, 1.34)         | 1.39 (1.02, 1.90) | 1.15 (0.98, 1.34)      | 1.10 (0.94, 1.29)      |
|                                             |                           |                   |                        |                        |
| <b>Categorical test results</b>             |                           |                   |                        |                        |
| <b>ECG-LVH*</b>                             | 2.35 (1.63, 3.40)         | 1.92 (0.86, 4.29) | 1.55 (1.06, 2.27)      | 1.42 (0.97, 2.08)      |
| <b>CAC &gt; 10 U</b>                        | 4.11 (2.96, 5.69)         | 3.33 (1.86, 5.96) | 1.62 (1.14, 2.31)      | 1.49 (1.04, 2.12)      |
| <b>NT-proBNP <math>\geq</math>100 pg/mL</b> | 4.10 (3.06, 5.49)         | 3.03 (1.57, 5.85) | 2.43 (1.75, 3.36)      | 2.21 (1.59, 3.07)      |
| <b>hs-cTnT <math>\geq</math> 5 ng/L</b>     | 4.21 (3.02, 5.87)         | 4.11 (2.27, 7.43) | 1.54 (1.06, 2.23)      | 1.36 (0.94, 1.98)      |
| <b>hs-CRP <math>\geq</math> 3 mg/L</b>      | 1.52 (1.14, 2.03)         | 1.77 (0.98, 3.18) | 1.40 (1.03, 1.90)      | 1.33 (0.98, 1.80)      |

Only unadjusted results are presented in DHS, due to small numbers of endpoint events. Model 1 is adjusted for age, sex, race, smoking status, diabetes, total cholesterol, HDL-cholesterol, systolic blood pressure and blood pressure medications, and statin medications. Model 2 includes the components of model 1 and all 5 test results. The Hazard Ratio (HR) for continuous test results reflects a one standard deviation change in Ln value of the test result. Coefficients were determined separately for each model.

\* ECG-LVH was treated as a categorical variable in both analyses.

**Supplementary Table 7. Change in risk prediction metrics in MESA for ASVD endpoint, with addition of other biomarkers to models including coronary calcium**

|                                      | <b>C-statistic</b> | <b>Category Free NRI</b> | <b>IDI</b>              |
|--------------------------------------|--------------------|--------------------------|-------------------------|
| <b>Base Model</b>                    | 0.748              | NA                       | NA                      |
| <b>Base Model + CAC</b>              | 0.771 <sup>†</sup> | 0.449 (0.344,0.554)      | 0.021 (0.015, 0.027)    |
| <b>Base Model + CAC + ECG LVH*</b>   | 0.772              | -0.011 (-0.142, 0.120)   | 0.0005 (-0.002, 0.003)  |
| <b>Base Model + CAC + NT-proBNP*</b> | 0.776 <sup>‡</sup> | 0.118 (0.024, 0.212)     | 0.017 (0.009, 0.025)    |
| <b>Base Model + CAC + hs-cTnT*</b>   | 0.775 <sup>‡</sup> | 0.164 (0.07,0.257)       | 0.019 (0.011, 0.026)    |
| <b>Base Model + CAC + hs-CRP*</b>    | 0.771              | 0.051 (-0.014,0.227)     | -0.0001 (-0.002, 0.001) |
| <b>Base Model + all 5 tests*</b>     | 0.779 <sup>†</sup> | 0.228 (0.124,0.333)      | 0.028 (0.016, 0.039)    |

\* Comparisons vs base model + CAC.

<sup>†</sup>p<0.001; <sup>‡</sup>p<0.05 vs base model

**Supplementary Table 8. Change in risk prediction metrics with MESA models directly applied to DHS**

|                                 | Coefficients Derived in DHS* |                                       |                      |                      | Coefficients Derived in MESA and Applied to DHS |                                       |                      |                       |
|---------------------------------|------------------------------|---------------------------------------|----------------------|----------------------|-------------------------------------------------|---------------------------------------|----------------------|-----------------------|
|                                 | C-statistic Base Model       | C-statistic Base Model + Test Results | Category free NRI    | IDI                  | C-statistic Base Model                          | C-statistic Base Model + Test Results | Category free NRI    | IDI                   |
| <b>Global CVD</b>               | 0.832                        | 0.850 <sup>†</sup>                    | 0.261 (0.052,0.47)   | 0.024 (0.008, 0.04)  | 0.810                                           | 0.828 <sup>‡</sup>                    | 0.199 (0.083, 0.621) | 0.048 (0.027, 0.069)  |
| <b>ASCVD</b>                    | 0.859                        | 0.873 <sup>†</sup>                    | 0.355 (0.129,0.581)  | 0.021 (0.001, 0.041) | 0.823                                           | 0.841 <sup>‡</sup>                    | 0.416 (0.123, 0.822) | 0.019 (0.002, 0.036)  |
| <b>CHD</b>                      | 0.865                        | 0.889 <sup>†</sup>                    | 0.585 (0.294,0.877)  | 0.058 (0.023, 0.093) | 0.857                                           | 0.861                                 | 0.522 (-0.571,0.913) | 0.021 (-0.004, 0.045) |
| <b>Heart Failure</b>            | 0.840                        | 0.871 <sup>‡</sup>                    | 0.719 (0.381,0.989)  | 0.13 (0.042, 0.218)  | 0.759                                           | 0.790 <sup>§</sup>                    | 0.824 (0.431,1.401)  | 0.25 (0.142, 0.350)   |
| <b>All-Cause Mortality</b>      | 0.817                        | 0.829                                 | 0.061 (-0.516,0.638) | 0.03 (0.005, 0.055)  | 0.777                                           | 0.794 <sup>‡</sup>                    | 0.230 (-0.157,0.704) | 0.02 (0.001, 0.038)   |
| <b>Cardiovascular Mortality</b> | 0.840                        | 0.858                                 | 0.308 (-0.045,0.662) | 0.012 (-0.01, 0.034) | 0.781                                           | 0.796                                 | 0.238 (-0.168,0.753) | 0.001 (-0.02, 0.025)  |

\* The data for the coefficients derived in DHS is reproduced from Table 4 in the main manuscript and is shown here for comparison vs the models directly applied from MESA to DHS

<sup>†</sup>p<0.01; <sup>‡</sup>p<0.05; <sup>§</sup>p<0.0001 vs base model



**Supplementary Table 9. Association of Number of Multimodality Risk Score with Demographic Variables and Risk Factors in MESA**

| Variable                    | Multimodality Risk Score/Number of Abnormal Tests |                   |                   |                   |                   | p-trend |
|-----------------------------|---------------------------------------------------|-------------------|-------------------|-------------------|-------------------|---------|
|                             | 0                                                 | 1                 | 2                 | 3                 | ≥4                |         |
| N                           | 1332                                              | 2009              | 1789              | 1096              | 395               |         |
| Age                         | 53 [49, 61]                                       | 58 [52, 66]       | 65 [57, 72]       | 70 [63, 76]       | 72 [67, 78]       | <.0001  |
| Male                        | 539 (40%)                                         | 880 (44%)         | 942 (53%)         | 568 (52%)         | 200 (51%)         | <.0001  |
| White                       | 447 (34%)                                         | 702 (35%)         | 753 (42%)         | 462 (42%)         | 176 (45%)         | <.0001  |
| Black                       | 305 (23%)                                         | 568 (28%)         | 499 (28%)         | 319 (29%)         | 124 (31%)         | 0.0003  |
| Hispanic                    | 315 (24%)                                         | 468 (23%)         | 372 (21%)         | 238 (22%)         | 78 (20%)          | 0.03    |
| Asian/Other                 | 265 (20%)                                         | 271 (13%)         | 165 (9%)          | 77 (7%)           | 17 (4%)           | <.0001  |
| BMI                         | 26.0 [23.2, 28.9]                                 | 27.7 [24.6, 31.2] | 28.2 [25.1, 31.7] | 28.4 [25.1, 32.3] | 29.1 [25.5, 33.0] | <.0001  |
| Hypertension                | 274 (21%)                                         | 738 (37%)         | 928 (52%)         | 722 (66%)         | 306 (77%)         | <.0001  |
| Medication for hypertension | 219 (16%)                                         | 607 (30%)         | 787 (44%)         | 594 (54%)         | 256 (65%)         | <.0001  |
| SBP                         | 115 [105, 128]                                    | 120 [109, 135]    | 127 [115, 142]    | 135 [121, 149]    | 141 [126, 160]    | <.0001  |
| DBP                         | 71 [64, 78]                                       | 72 [65, 78]       | 73 [66, 79]       | 72 [66, 80]       | 73 [65, 82]       | <.0001  |
| Diabetes                    | 66 (5%)                                           | 211 (11%)         | 262 (15%)         | 217 (20%)         | 77 (19%)          | <.0001  |
| Current smoker              | 155 (12%)                                         | 290 (14%)         | 234 (13%)         | 122 (11%)         | 59 (15%)          | <.0001  |
| Hypercholesterolemia        | 423 (32%)                                         | 731 (36%)         | 715 (40%)         | 451 (41%)         | 146 (37%)         | <.0001  |
| Statin medication           | 124 (9%)                                          | 277 (14%)         | 301 (17%)         | 214 (20%)         | 69 (17%)          | <.0001  |
| Total Cholesterol           | 192 [172, 214]                                    | 193 [170, 215]    | 193 [172, 217]    | 189 [168, 215]    | 190 [167, 215]    | 0.13    |
| LDL Cholesterol             | 116 [97, 136]                                     | 116 [96, 137]     | 118 [98, 137]     | 113 [93, 135]     | 113 [93, 134]     | 0.03    |
| HDL Cholesterol             | 50 [42, 60]                                       | 48 [41, 59]       | 48 [40, 58]       | 48 [40, 59]       | 47 [40, 59]       | <.0001  |
| Triglycerides               | 101 [70, 149]                                     | 112 [78, 159]     | 114 [81, 164]     | 115 [79.5, 169]   | 112 [82, 165]     | <.0001  |

**Supplementary Table 10. Association of Multimodality Risk Score with Demographic Variables and Risk Factors in DHS**

| Variable                           | Multimodality Risk Score/Number of Abnormal Tests |                   |                   |                   | p-trend |
|------------------------------------|---------------------------------------------------|-------------------|-------------------|-------------------|---------|
|                                    | 0                                                 | 1                 | 2                 | ≥3                |         |
| N                                  | 762                                               | 915               | 381               | 144               |         |
| Age                                | 40 [35, 46]                                       | 44 [37, 52]       | 49 [43, 56]       | 54 [48, 60]       | <.0001  |
| Male                               | 386 (51%)                                         | 333 (36%)         | 181 (48%)         | 77 (53%)          | 0.14    |
| White                              | 306 (40%)                                         | 293 (32%)         | 125 (33%)         | 33 (23%)          | <.0001  |
| Black                              | 279 (37%)                                         | 447 (49%)         | 216 (57%)         | 99 (69%)          | <.0001  |
| Hispanic                           | 147 (19%)                                         | 162 (18%)         | 36 (9%)           | 12 (8%)           | <.0001  |
| Asian/Other                        | 30 (4%)                                           | 13 (1%)           | 4 (1%)            | 0 (0%)            | <.0001  |
| BMI                                | 26.4 [23.4, 29.4]                                 | 29.4 [25.5, 33.6] | 29.2 [25.6, 34.5] | 30.0 [24.9, 34.2] | <.0001  |
| Hypertension                       | 115 (15%)                                         | 276 (31%)         | 185 (50%)         | 102 (72%)         | <.0001  |
| Medication for hypertension        | 73 (10%)                                          | 171 (19%)         | 112 (29%)         | 59 (41%)          | <.0001  |
| SBP                                | 116 [109, 125]                                    | 121 [112, 131]    | 127 [118, 142]    | 140 [127, 158]    | <.0001  |
| DBP                                | 74 [69, 81]                                       | 77 [72, 84]       | 80 [74, 87]       | 84 [77, 91]       | <.0001  |
| Diabetes                           | 22 (3%)                                           | 85 (9%)           | 59 (15%)          | 38 (26%)          | <.0001  |
| Current smoker                     | 195 (26%)                                         | 234 (26%)         | 110 (29%)         | 57 (40%)          | 0.02    |
| Hypercholesterolemia (self report) | 66 (9%)                                           | 122 (13%)         | 69 (18%)          | 30 (21%)          | <.0001  |
| Statin medication                  | 24 (3%)                                           | 50 (5%)           | 31 (8%)           | 20 (14%)          | <.0001  |
| Total Cholesterol                  | 176 [154, 202]                                    | 180 [158, 206]    | 186 [162, 209]    | 179 [158, 209]    | 0.0002  |
| LDL Cholesterol                    | 104 [81, 125]                                     | 107 [85, 130]     | 110 [87, 132]     | 110 [83, 132]     | 0.003   |
| HDL Cholesterol                    | 48 [41, 58]                                       | 48 [40, 57]       | 47 [40, 57]       | 47 [39, 55]       | 0.24    |
| Triglycerides                      | 89 [64, 138]                                      | 100 [70, 147]     | 108 [73, 152]     | 101 [74, 154]     | <.0001  |

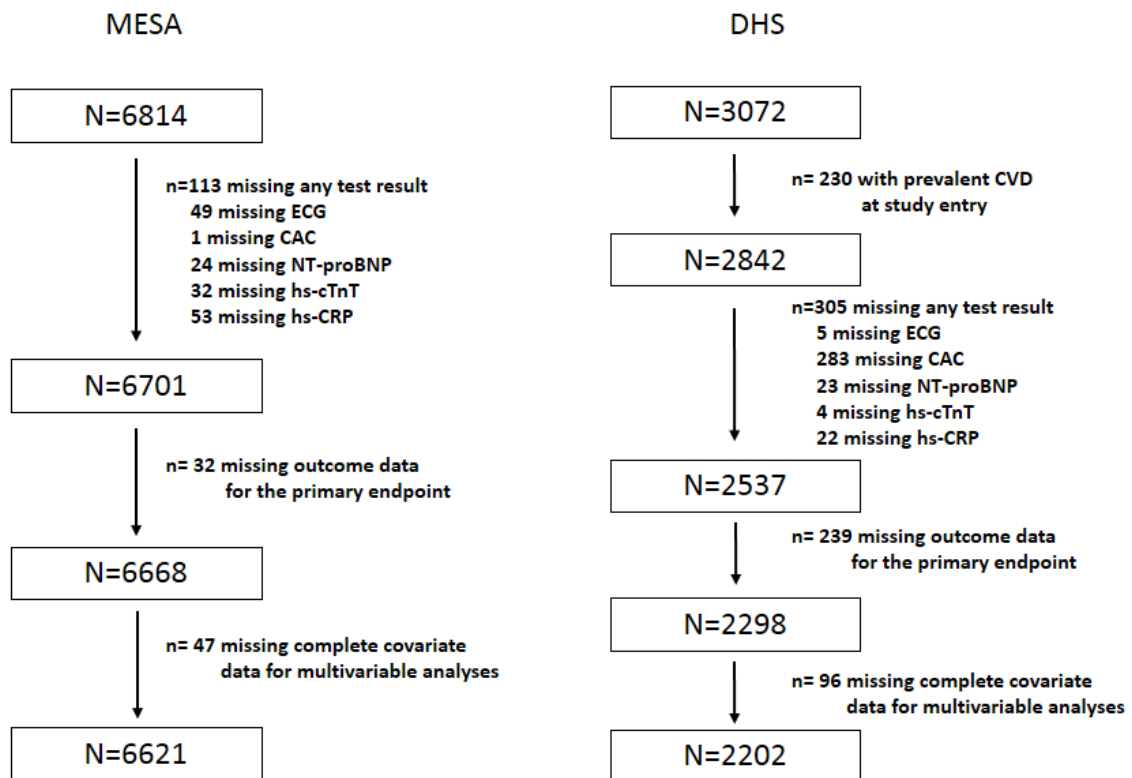

**Supplementary Figure 1. Consort diagram showing the numbers of individuals excluded from the statistical analyses in MESA and DHS**

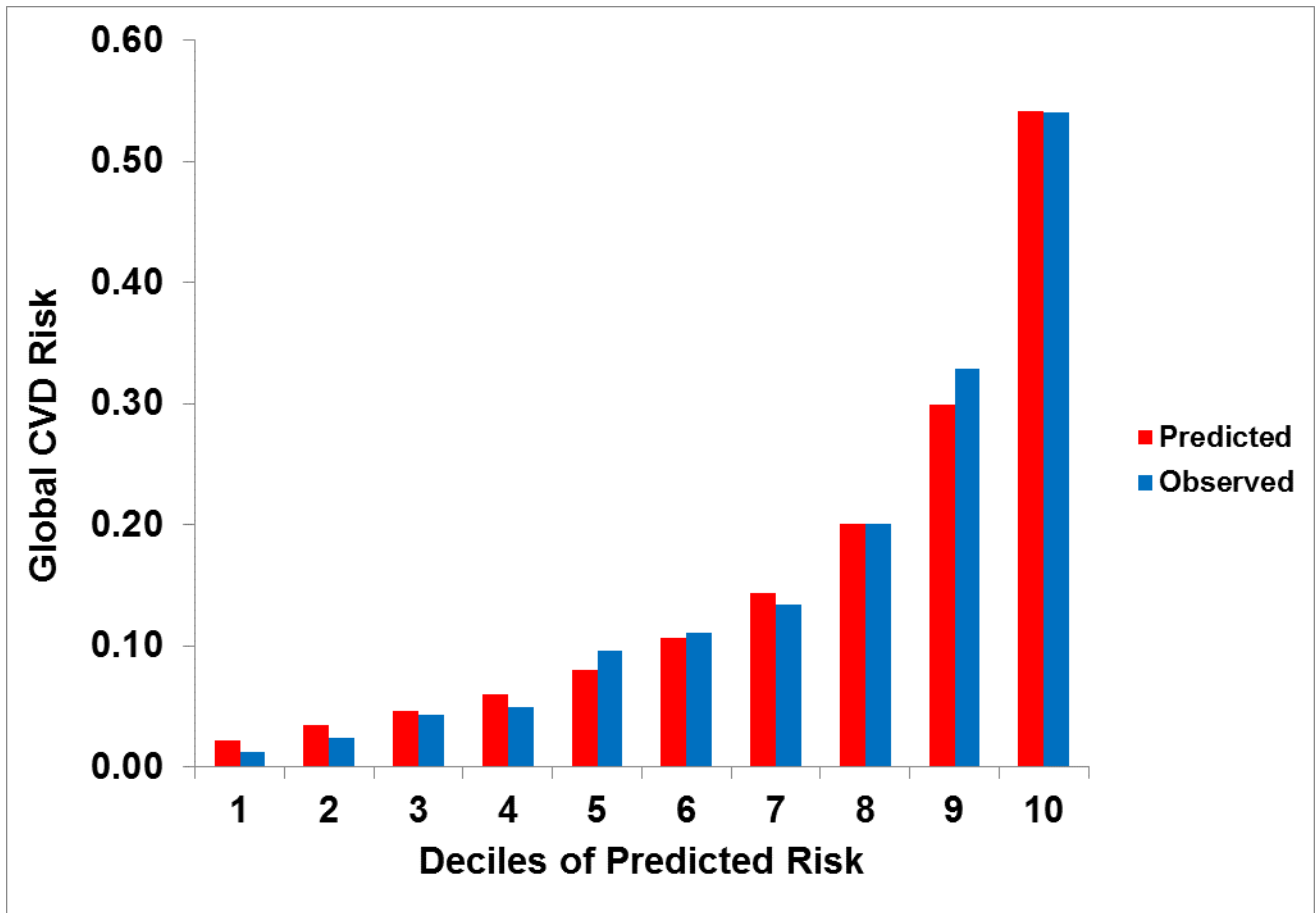

Supplementary Figure 2, Panel A

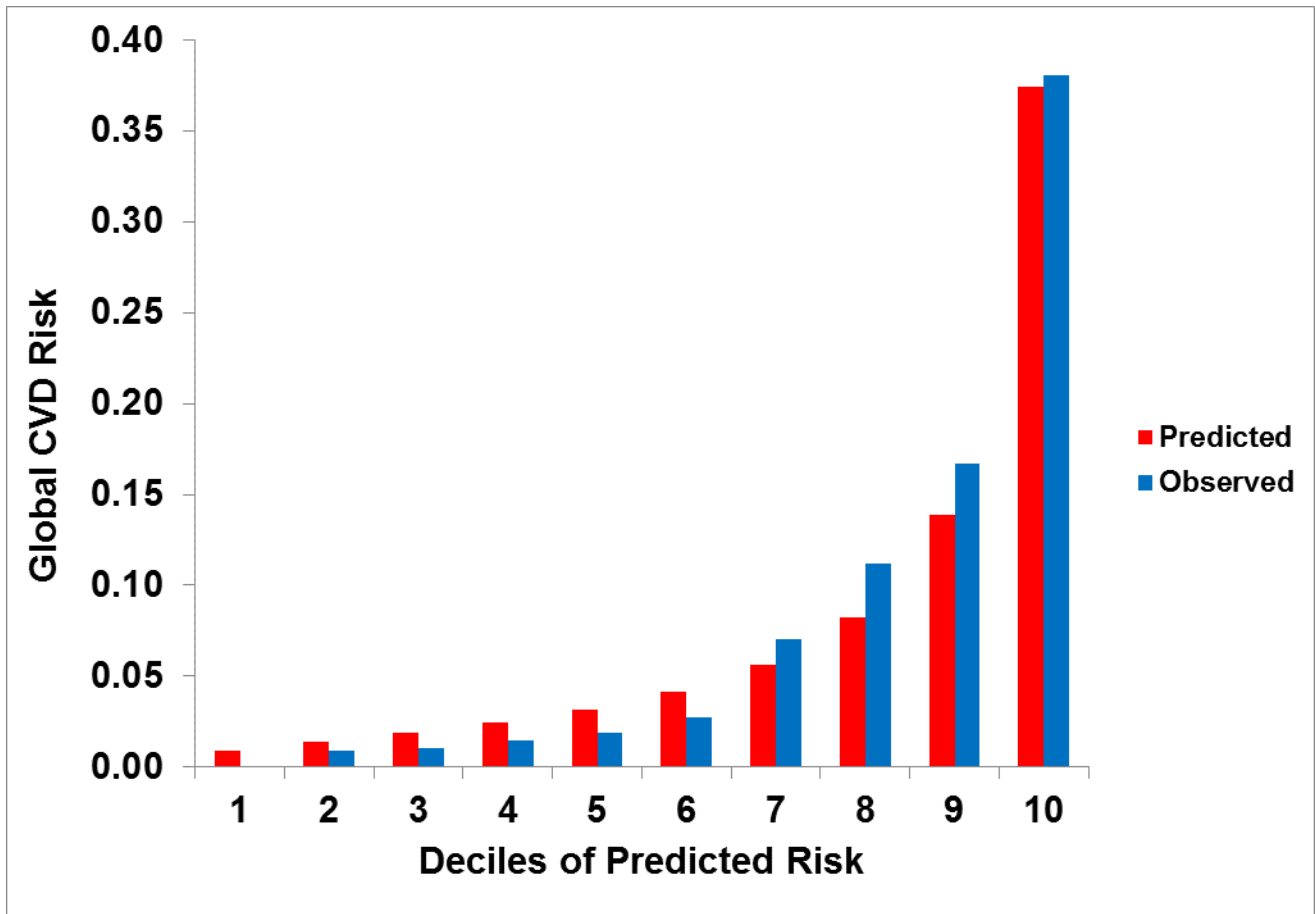

Supplementary Figure 2, Panel B.

Supplementary Figure 2. Calibration for the global cardiovascular disease endpoint for the fully adjusted model including traditional risk factors, creatinine, and the 5 test results. Panel A is from MESA (Nam-D'Agostino  $\chi^2=12.2$ ,  $p=0.20$ ) and Panel B is from DHS (Nam-D'Agostino  $\chi^2=11.5$ ,  $p=0.24$ )

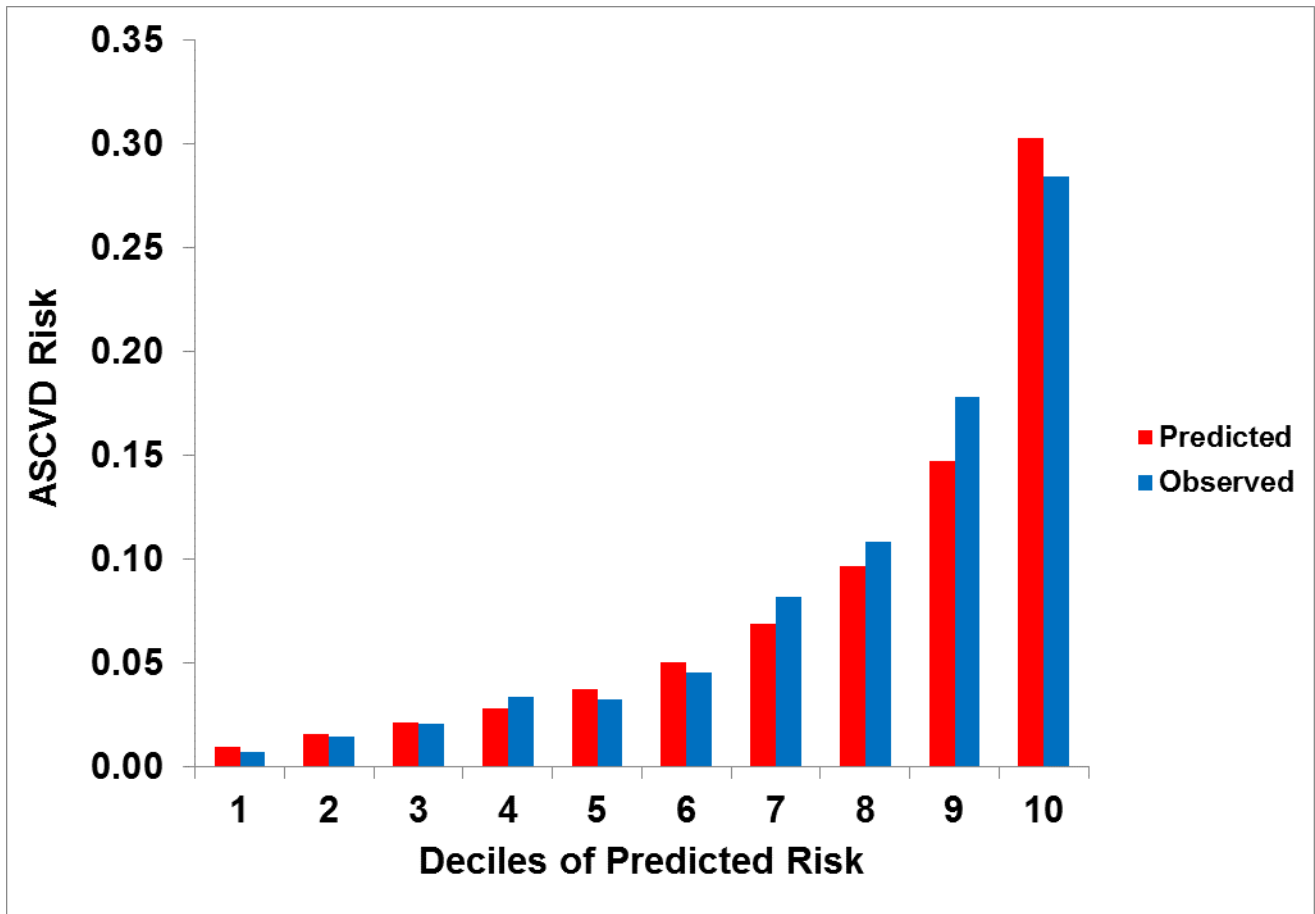

Supplementary Figure 3, Panel A.

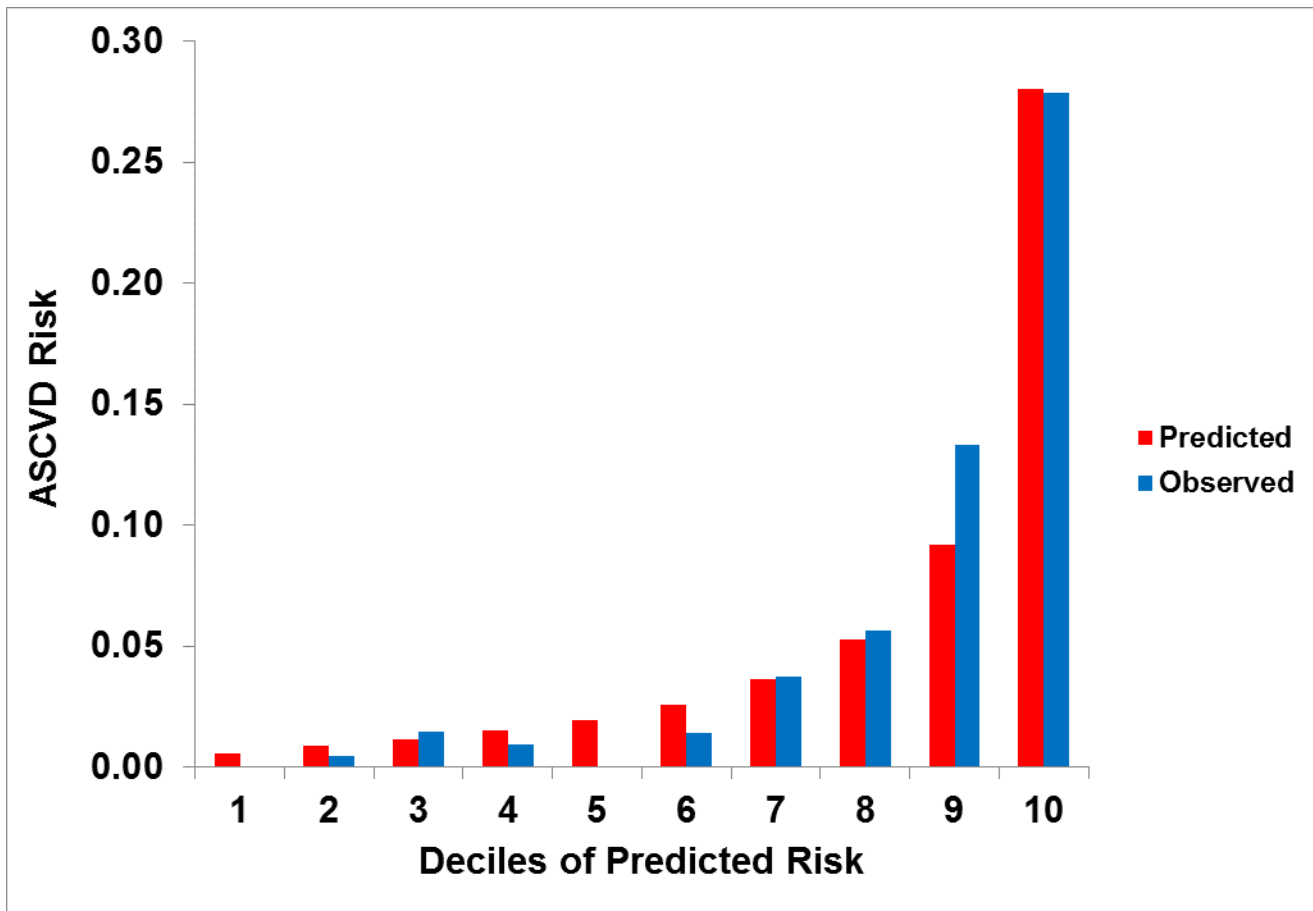

Supplementary Figure 3, Panel B.

Supplementary Figure 3. Calibration for the atherosclerotic cardiovascular disease (ASCVD) endpoint for the fully adjusted model including traditional risk factors and the 5 test results. Panel A is from MESA (Nam-D'Agostino  $\chi^2=11.1$ ,  $p=0.27$ ) and Panel B is from DHS (Nam-D'Agostino  $\chi^2=12.5$ ,  $p=0.19$ )

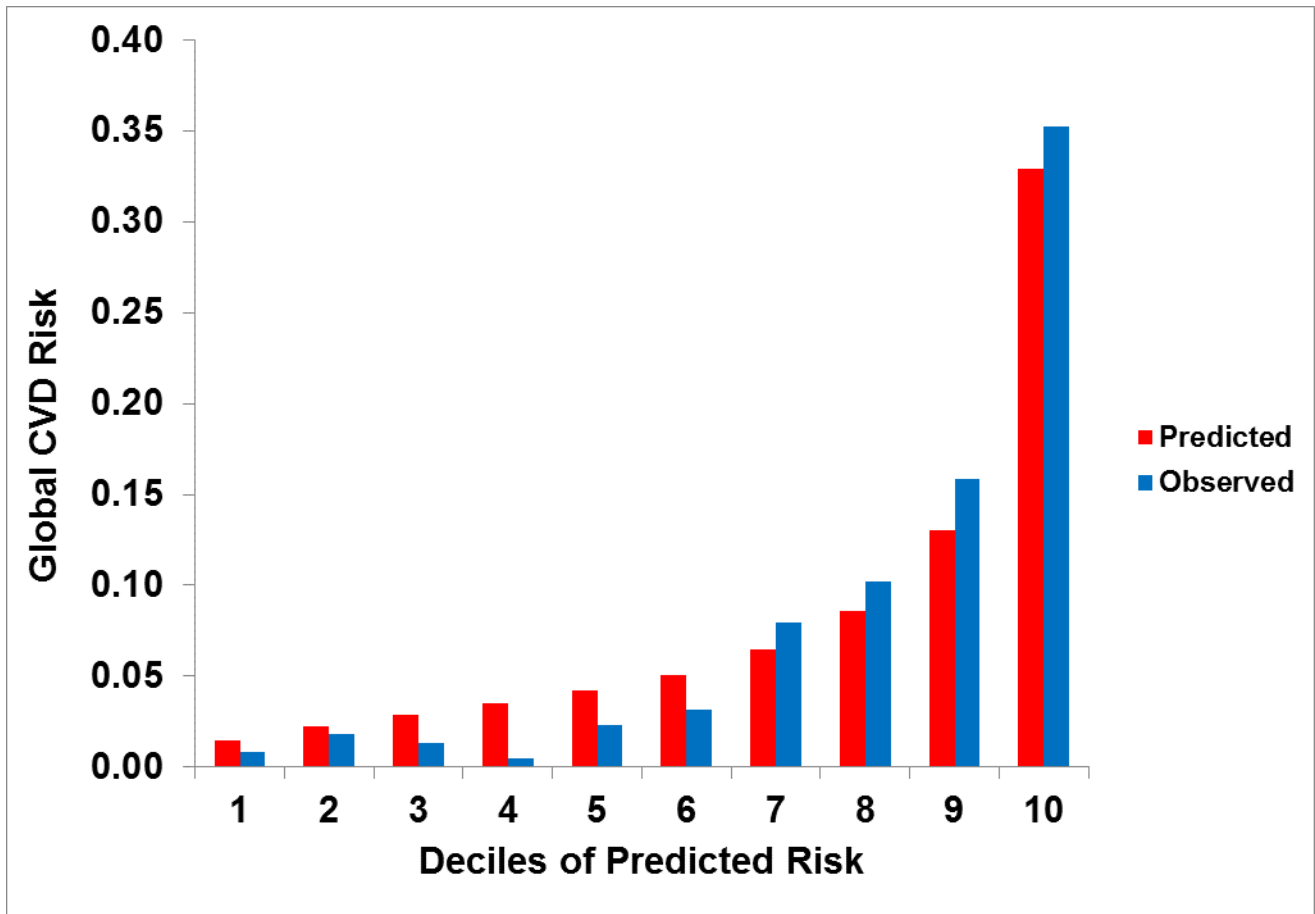

Supplementary Figure 4, Panel A.



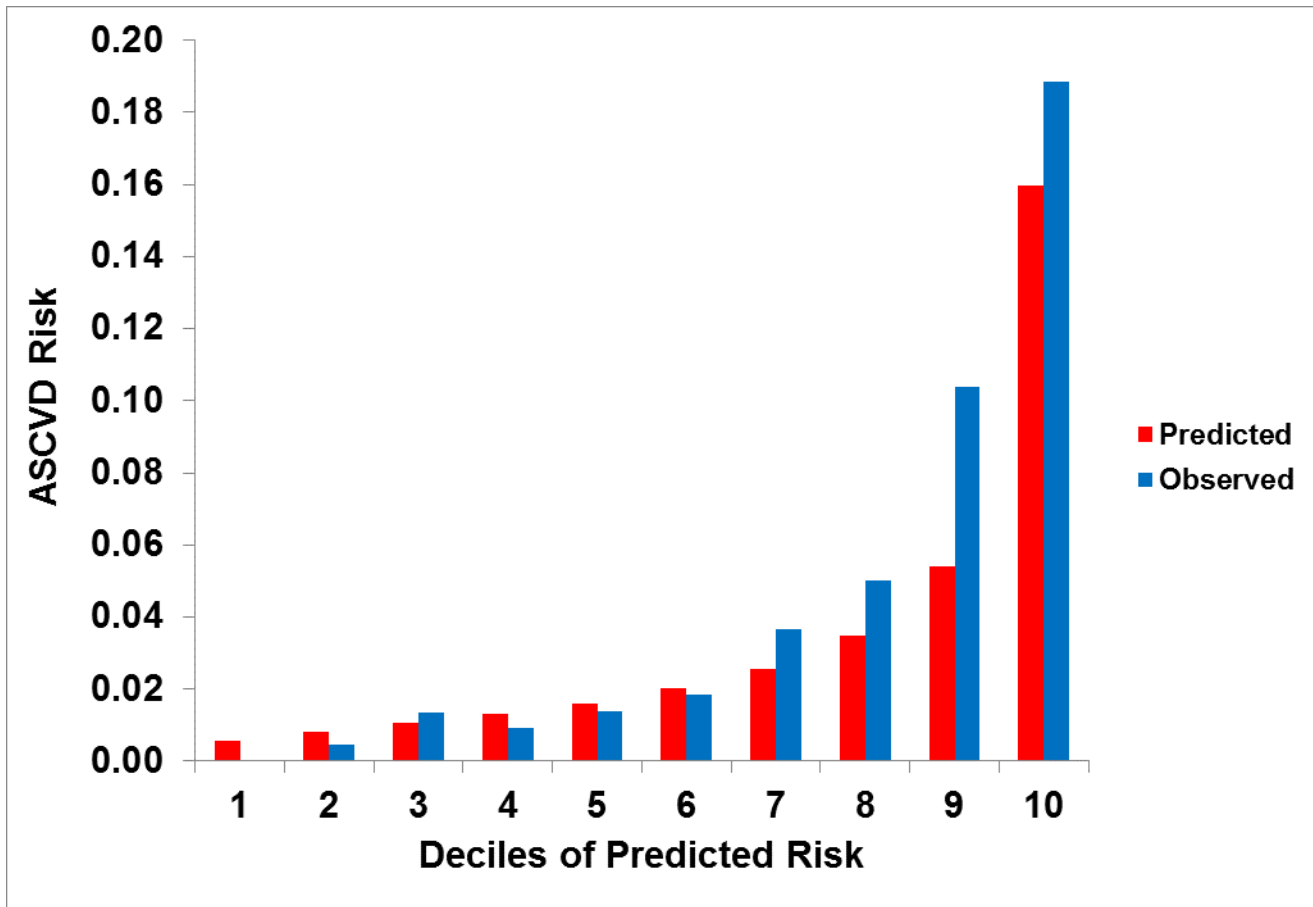

Supplementary Figure 4, Panel B

Supplementary Figure 4. Calibration plots from MESA models directly applied to DHS (using coefficients from MESA). Panel A is for Global CVD: Nam-D'Agostino  $\chi^2$  16.05,  $p=0.07$ ; calibration slope=1.028. Panel B is for ASCVD: Nam-D'Agostino  $\chi^2=17.1$ ,  $p=0.05$ ; calibration slope=1.184.

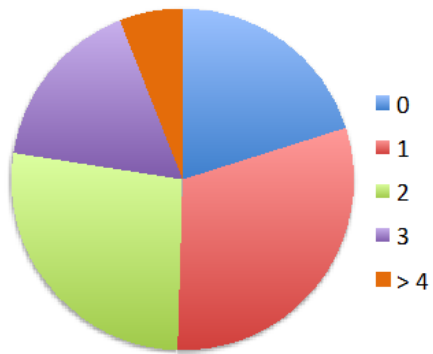

**MESA**

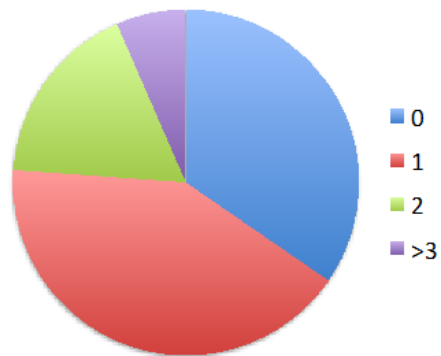

**DHS**

**Supplementary Figure 5, Panel A.**

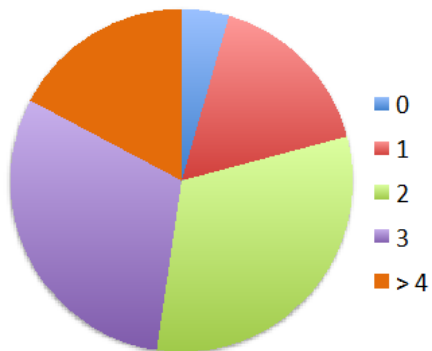

**MESA**

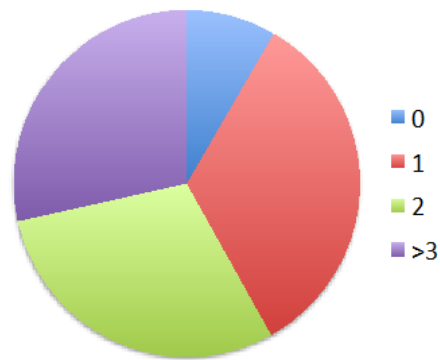

**DHS**

**Supplementary Figure 5, Panel B.**

**Supplementary Figure 5. Panel A: Distribution of Multimodality Risk Score in the overall MESA and DHS study cohorts. Panel B: Proportion of Global CVD Events Occurring in Different Risk Score Categories.**

In MESA, participants with scores  $\geq 2$  comprised  $<50\%$  of the cohort but accounted for 79% of the events. In the younger DHS population, participants with a score  $\geq 2$  comprised 24% of the cohort but accounted for 58% of events.

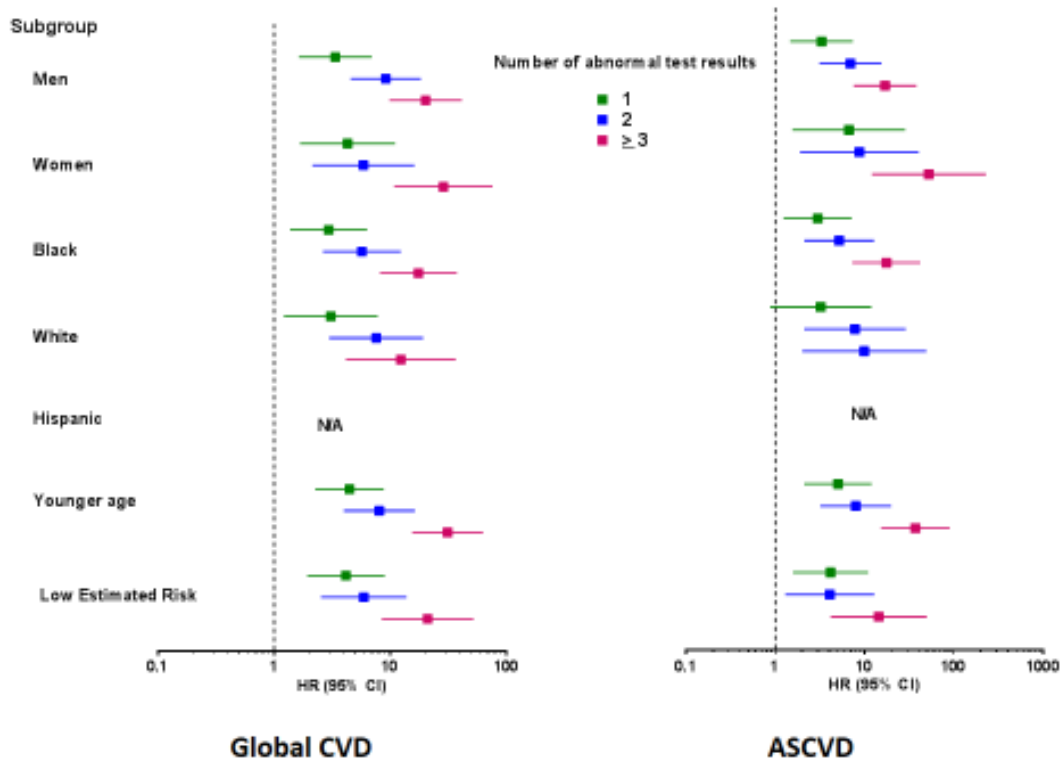

**Supplementary Figure 6. Unadjusted associations between the number of abnormal test results and the composite global and atherosclerotic cardiovascular disease outcomes in selected subgroups in the DHS.**

All comparisons are versus participants with a risk score =0. No significant interactions were seen across subgroups ( $p > 0.05$  for each). Younger age is defined as age <55 in men and <65 in women. Low estimated risk is defined as 10-year estimated ASCVD risk < 7.5% using the pooled cohort equations.

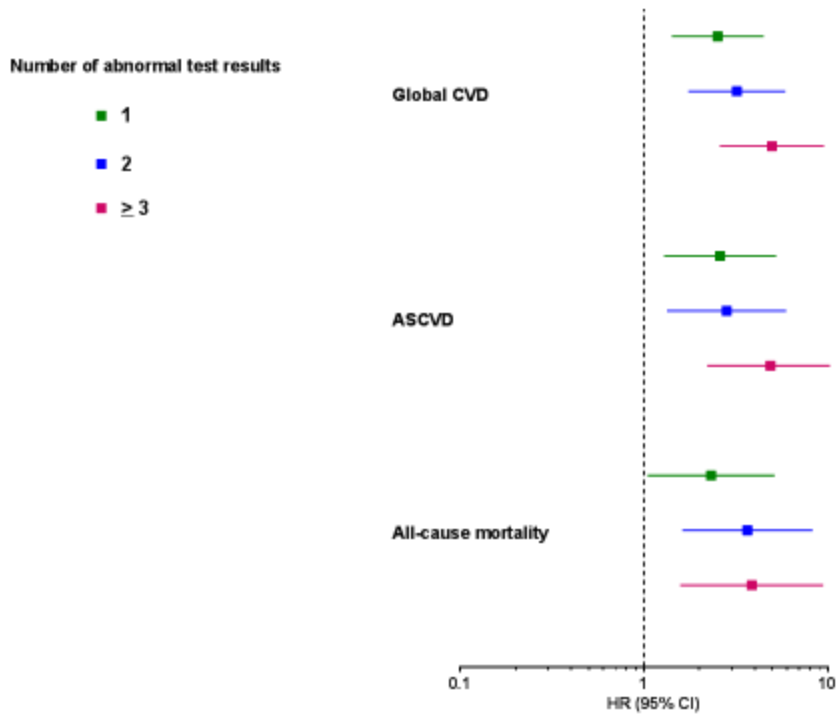

**Supplementary Figure 7. Multivariable-adjusted association between the number of abnormal test results and cardiovascular endpoints in the DHS.**

All comparisons are versus participants with a risk score=0. Models are adjusted for age, sex, race, smoking status, diabetes, total cholesterol, HDL-cholesterol, systolic blood pressure and blood pressure medications, and statin medications. The global CVD model was additionally adjusted for serum creatinine. Other endpoints were not evaluated in DHS due to small endpoint numbers
